# Supplementary material
Source: Springer Nature journal article supplement (https://www.springermedizin.de/resource/supplementary/13046_2008_82_MOESM5_ESM.pdf/9661478)

A

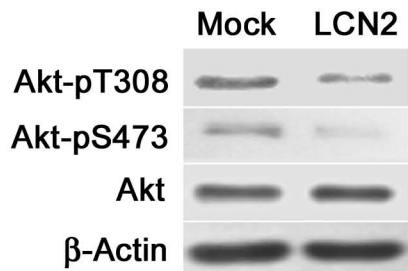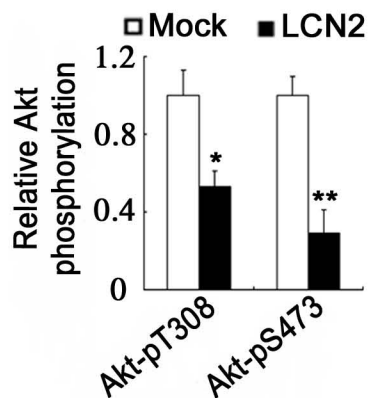

B

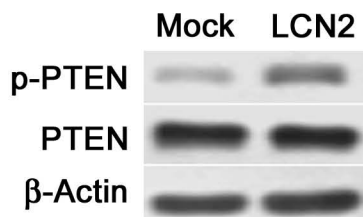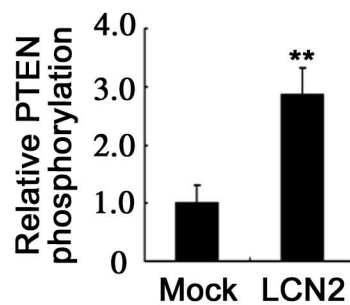

C

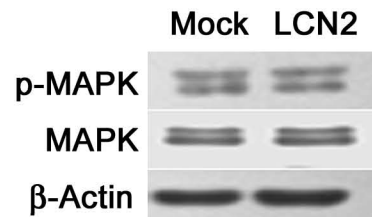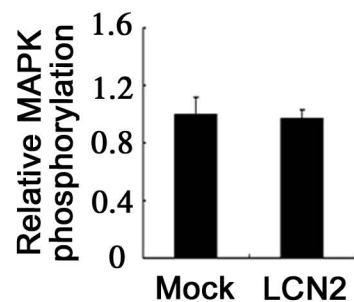

D

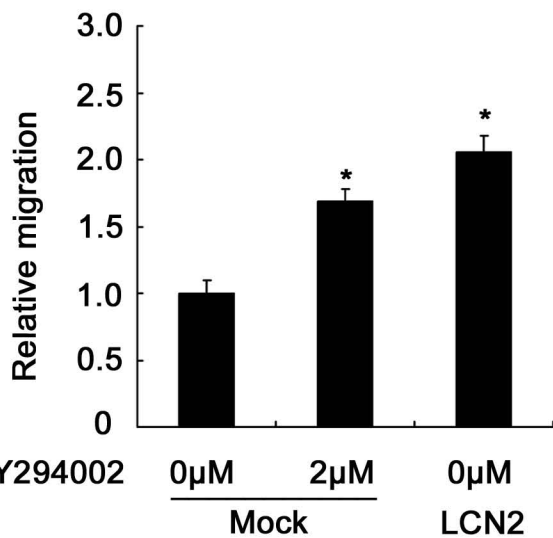

E

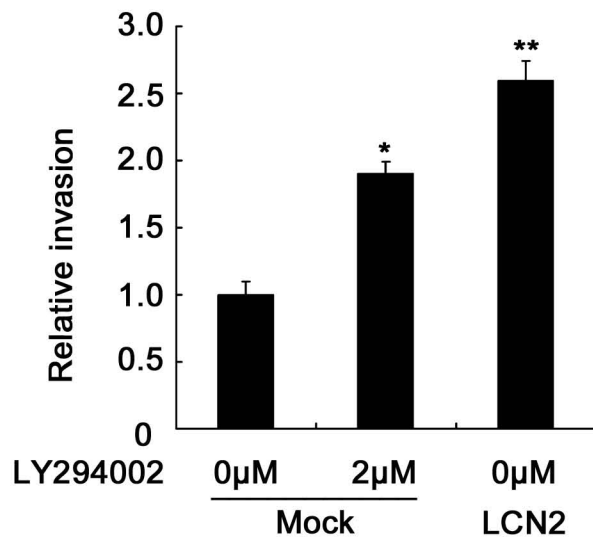

Supplement: MOESM5 [file 9661478]
